# Supplementary material
Source: Research Square preprint supplement (doi:10.21203/rs.3.rs-8073483/v1)
Supplement: Supplementary file 1 [file f0044be92e7e8dafa9d9e1a0.pdf]

Dear Editor,

We would like to inform you of the long existing conflict of interest between our team and those of Dr. A. Belov of th IZMIRAN team.

Please do not send our manuscript to Dr. A. Belov or those collaborating with him.

Many thanks for your understanding.

Best wishes

Dr. Okike

Full Name of the Candidate: \_\_\_\_\_
